# Supplementary material for: Characterization of altered molecular mechanisms in Parkinson’s disease through cell type–resolved multiomics analyses
Source: PubMed Central journal article supplement — Sci Adv. 2023 Apr 14;9(15):eabo2467. doi: 10.1126/sciadv.abo2467 (PMC10104466; doi:10.1126/sciadv.abo2467), 2023-04-14
Supplement: sciadv.abo2467_sm.pdf [file sciadv.abo2467_sm.pdf]

Supplementary Materials for  
**Characterization of altered molecular mechanisms in Parkinson's disease  
through cell type–resolved multiomics analyses**

Andrew J. Lee *et al.*

Corresponding author: Inkyung Jung, [ijung@kaist.ac.kr](mailto:ijung@kaist.ac.kr); Eliezer Masliah, [eliezer.masliah@nih.gov](mailto:eliezer.masliah@nih.gov)

*Sci. Adv.* **9**, eabo2467 (2023)  
DOI: 10.1126/sciadv.abo2467

**The PDF file includes:**

Figs. S1 to 14  
Legends for tables S1 to S10

**Other Supplementary Material for this manuscript includes the following:**

Tables S1 to S10

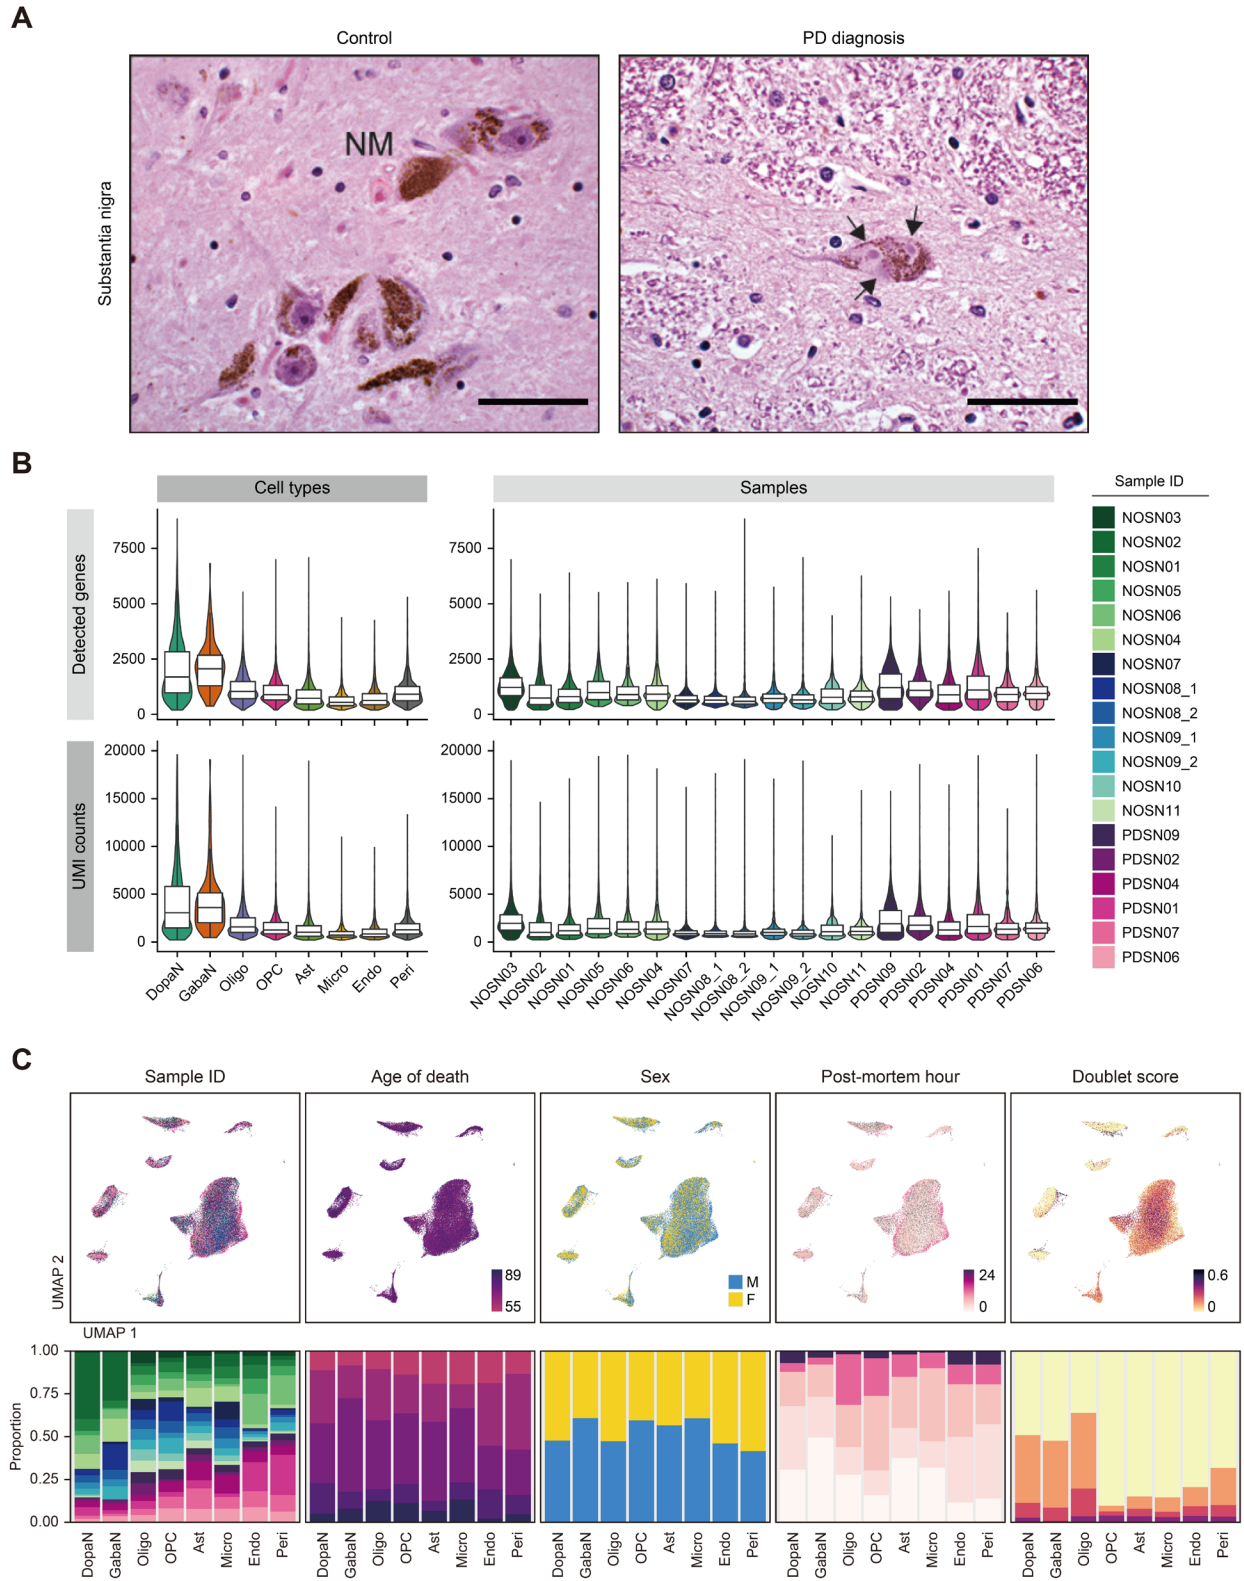

**Fig. S1. Pathological examination of human SN tissues and quality assessment of snRNA-seq clusters.**

**(A)** Histopathological analysis of the brains used in the experiment. Staining of SN sections by Hematoxylin and Eosin (H&E) shows loss of neurons, diminished neuromelanin (NM), and Lewy bodies in dopaminergic neurons in PD (PDSN02) compared to control (NOSN01). Arrows indicate Lewy body. Scale bars, 40  $\mu$ m. **(B)** Distributions of genes detected (top) and UMI counts (bottom) with respect to snRNA-seq cell types (left) and samples (right). Box boundaries and line correspond to the interquartile range (IQR) and median respectively. Whiskers extend to the lowest or highest data points that are no further than 1.5 times the IQR from the box boundaries. **(C)** Top: UMAP embeddings of snRNA-seq nuclei mapped to potential confounding variables (samples, age of death, sex, post-mortem hour, and doublet score). Bottom: bar plots illustrating the normalized proportion of each variable with respect to the cell types.

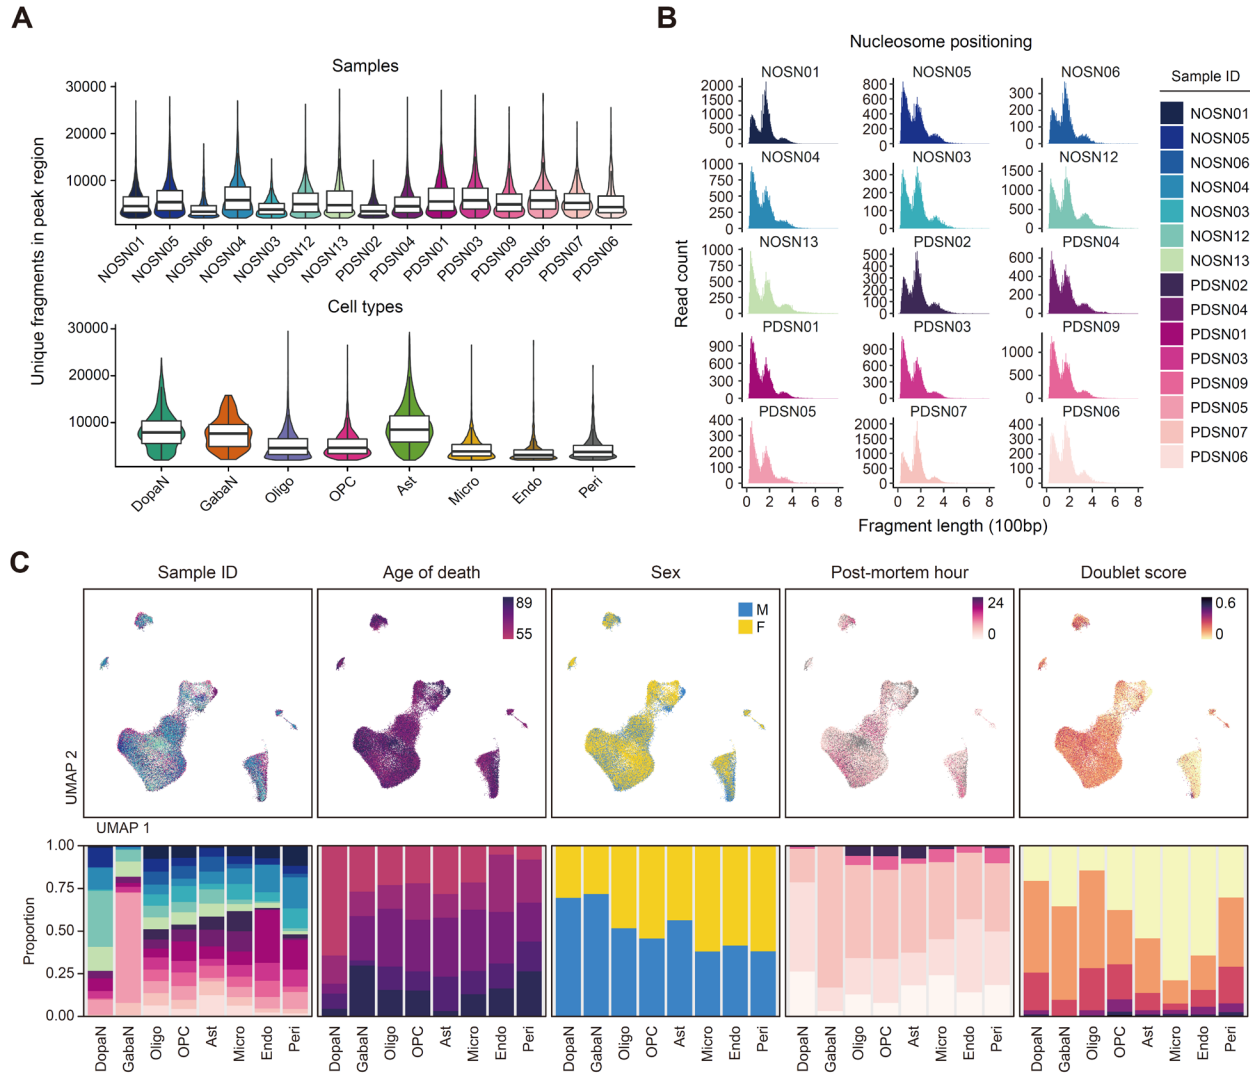

**Fig. S2. Data quality assessment of snATAC-seq clusters.**

**(A)** Distributions of unique fragments with respect to snATAC-seq samples (top) and cell types (bottom). Box boundaries and line correspond to the interquartile range (IQR) and median respectively. Whiskers extend to the lowest or highest data points that are no further than 1.5 times the IQR from the box boundaries. **(B)** Histograms of nucleosome positioning in each biological sample. **(C)** Top: UMAP embeddings of snATAC-seq nuclei mapped to potential confounding variables (samples, age of death, sex, post-mortem hour, and doublet score).

Bottom: bar plots illustrating the normalized proportion of each variable with respect to the cell types.

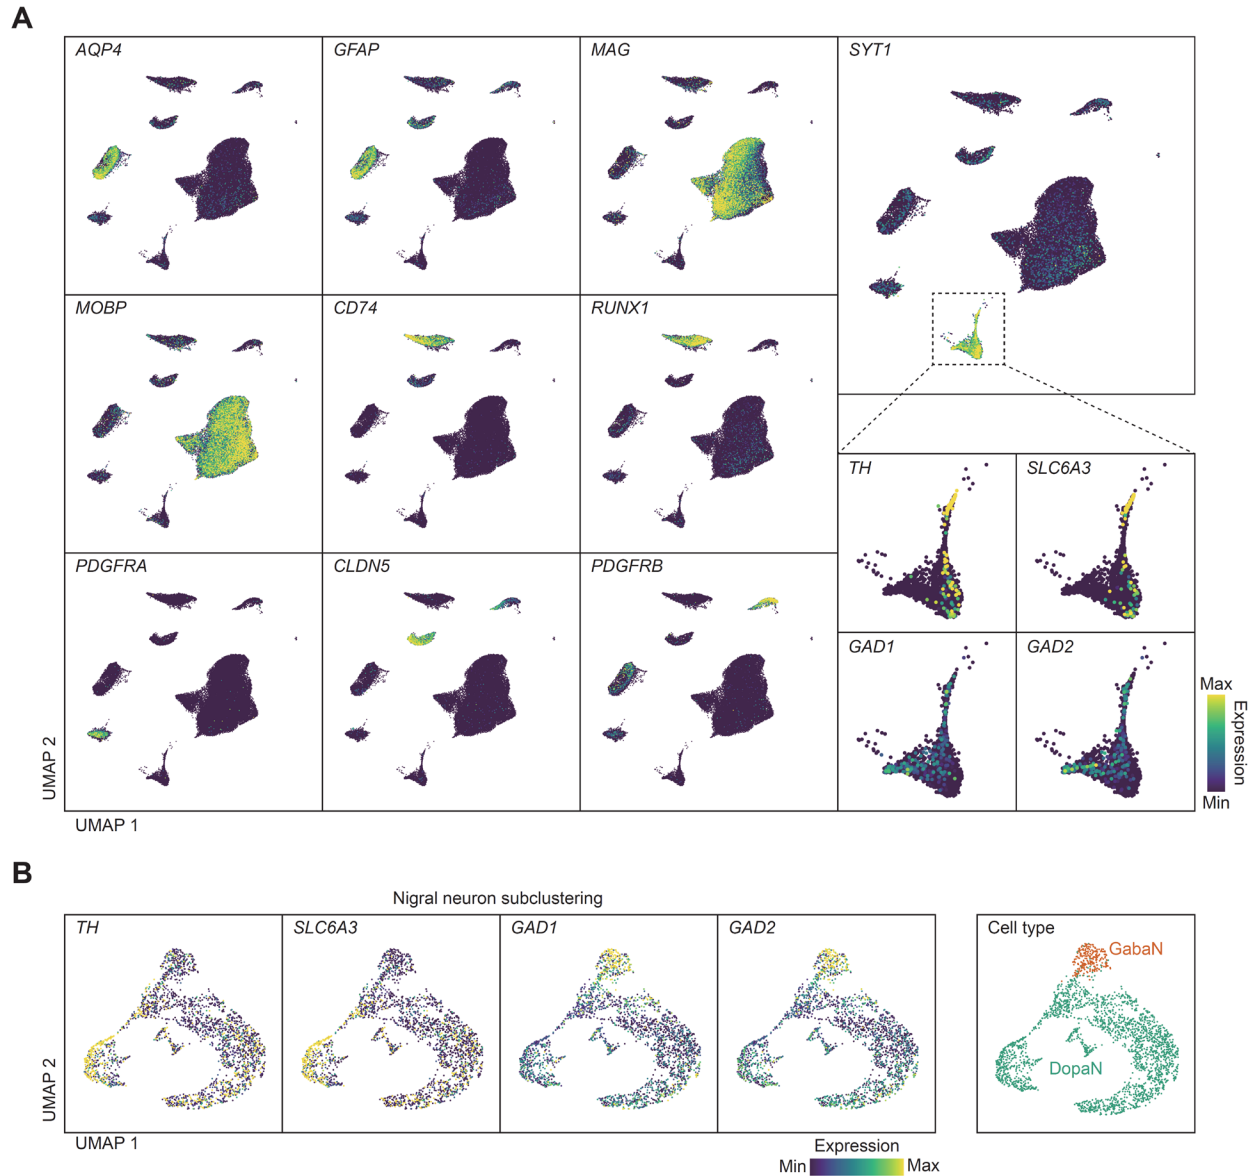

**Fig. S3. Cell type annotation for snRNA-seq clusters in the human SN.**

**(A)** UMAP embeddings of snRNA-seq nuclei illustrating the expression level of cell type markers to identify the major cell types present in the human SN; neurons (*SYT1*), oligodendrocytes (*MAG* and *MOBP*), oligodendrocyte precursor cells (*PDGFRA*), astrocytes (*AQP4* and *GFAP*), microglia (*CD74* and *RUNX1*), endothelial cells (*CLDN5*), and pericytes (*PDGFRB*). **(B)** UMAP embeddings of snRNA-seq nuclei illustrating the sub-annotation of

neuronal populations into dopaminergic neurons (*TH* and *SLC6A3*) and GABAergic neurons (*GAD1* and *GAD2*).

**A**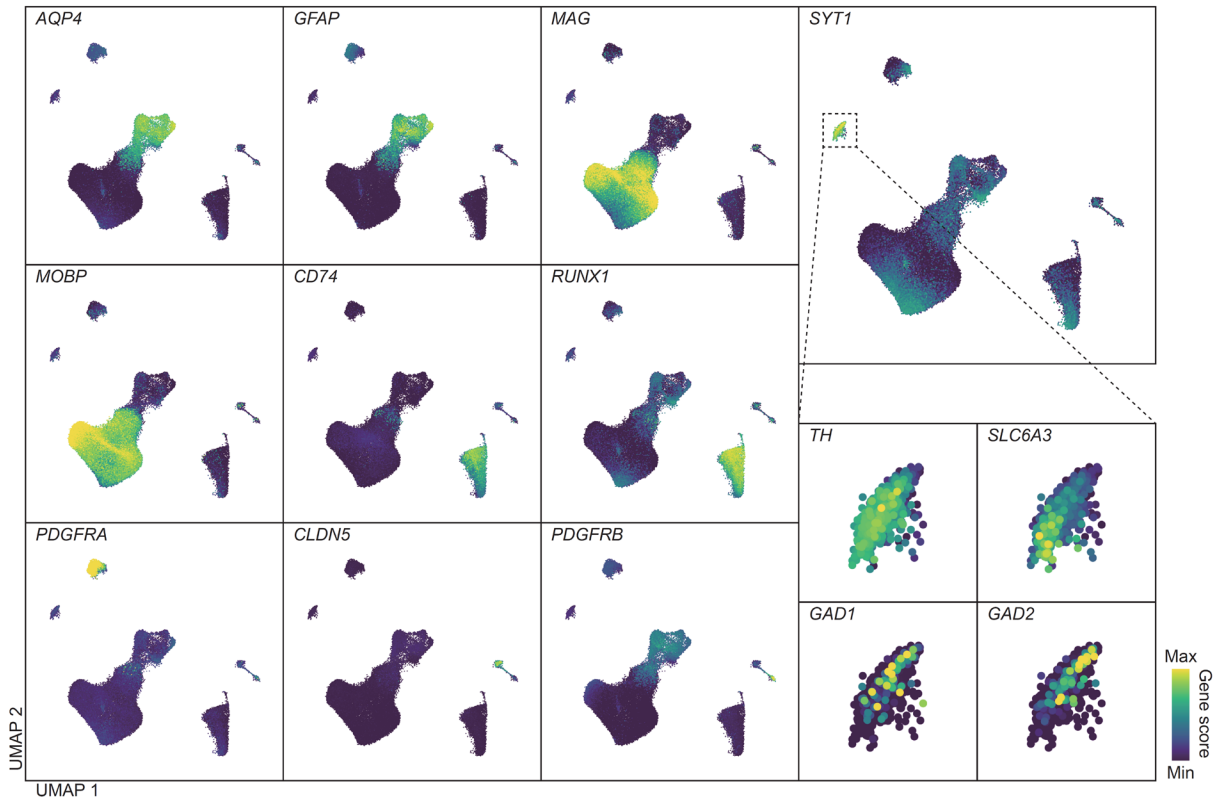**B**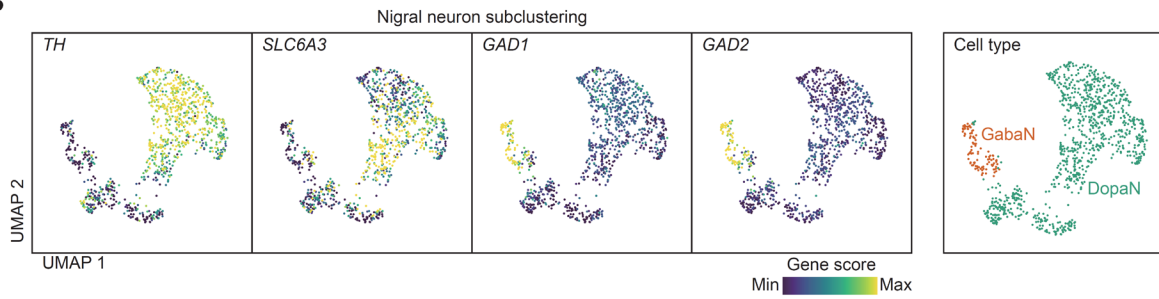**C**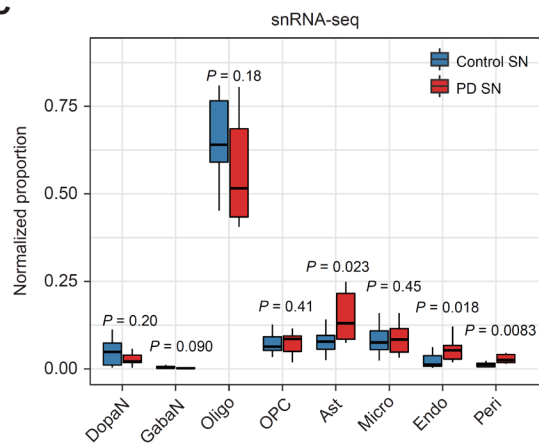**D**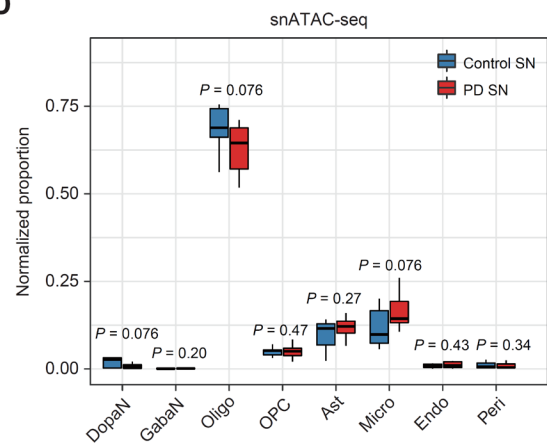



**Fig. S4. Cell type assignment for snATAC-seq clusters and cellular compositions in the human SN.**

(A) UMAP embeddings of snATAC-seq nuclei illustrating the gene activity score of cell type markers to identify the major cell types present in the human SN; neurons (*SYT1*), oligodendrocytes (*MAG* and *MOBP*), oligodendrocyte precursor cells (*PDGFRA*), astrocytes (*AQP4* and *GFAP*), microglia (*CD74* and *RUNX1*), endothelial cells (*CLDN5*), and pericytes (*PDGFRB*). (B) UMAP embeddings of snATAC-seq nuclei illustrating the sub-annotation of neuronal populations into dopaminergic neurons (*TH* and *SLC6A3*) and GABAergic neurons (*GAD1* and *GAD2*). (C-D) Box plots showing the proportion of nuclei mapped to each cell type and sample, compared between PD (red) and control (blue) SN for snRNA-seq (C) and snATAC-seq (D). Two-sided Wilcoxon tests are performed to measure the statistical significance of the difference in cellular compositions between PD and control cases. The box boundaries and line correspond to the interquartile range (IQR) and median, respectively. Whiskers extend to the lowest or highest data points that are no further than 1.5 times the IQR from the box boundaries.

**A**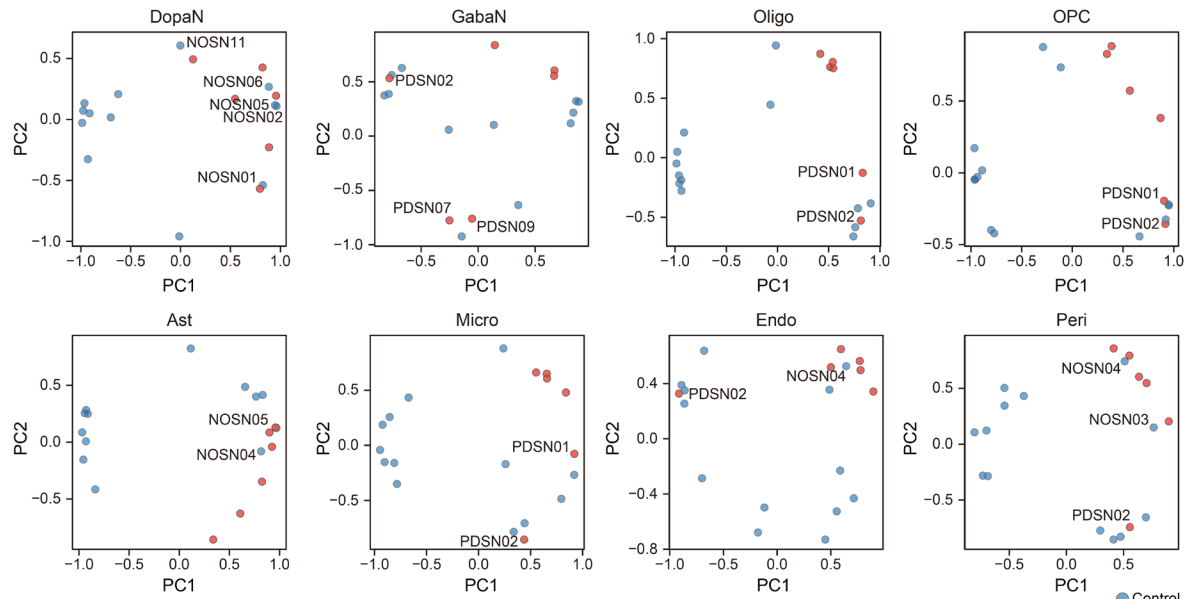**B**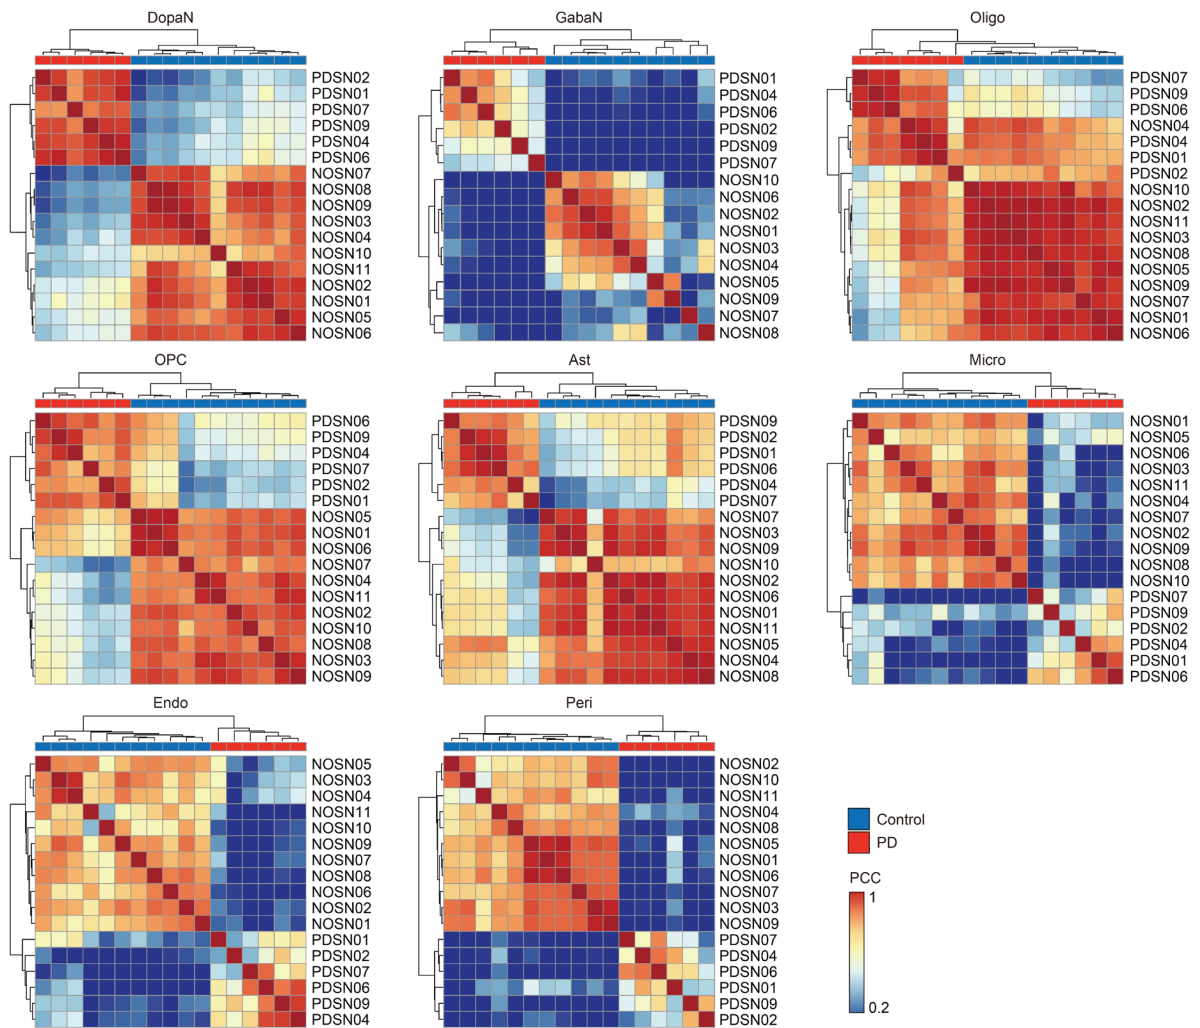

**Fig. S5. Sample reproducibility among PD and control donors based on snRNA-seq data.**

**(A)** PCA plots illustrating the overall similarity among PD and control snRNA-seq samples based on the top 1,000 variable genes obtained from each cell type. **(B)** Pearson correlation coefficients heatmap illustrating the reproducibility of PD and control cases based on PD-associated DEGs in individual cell types.

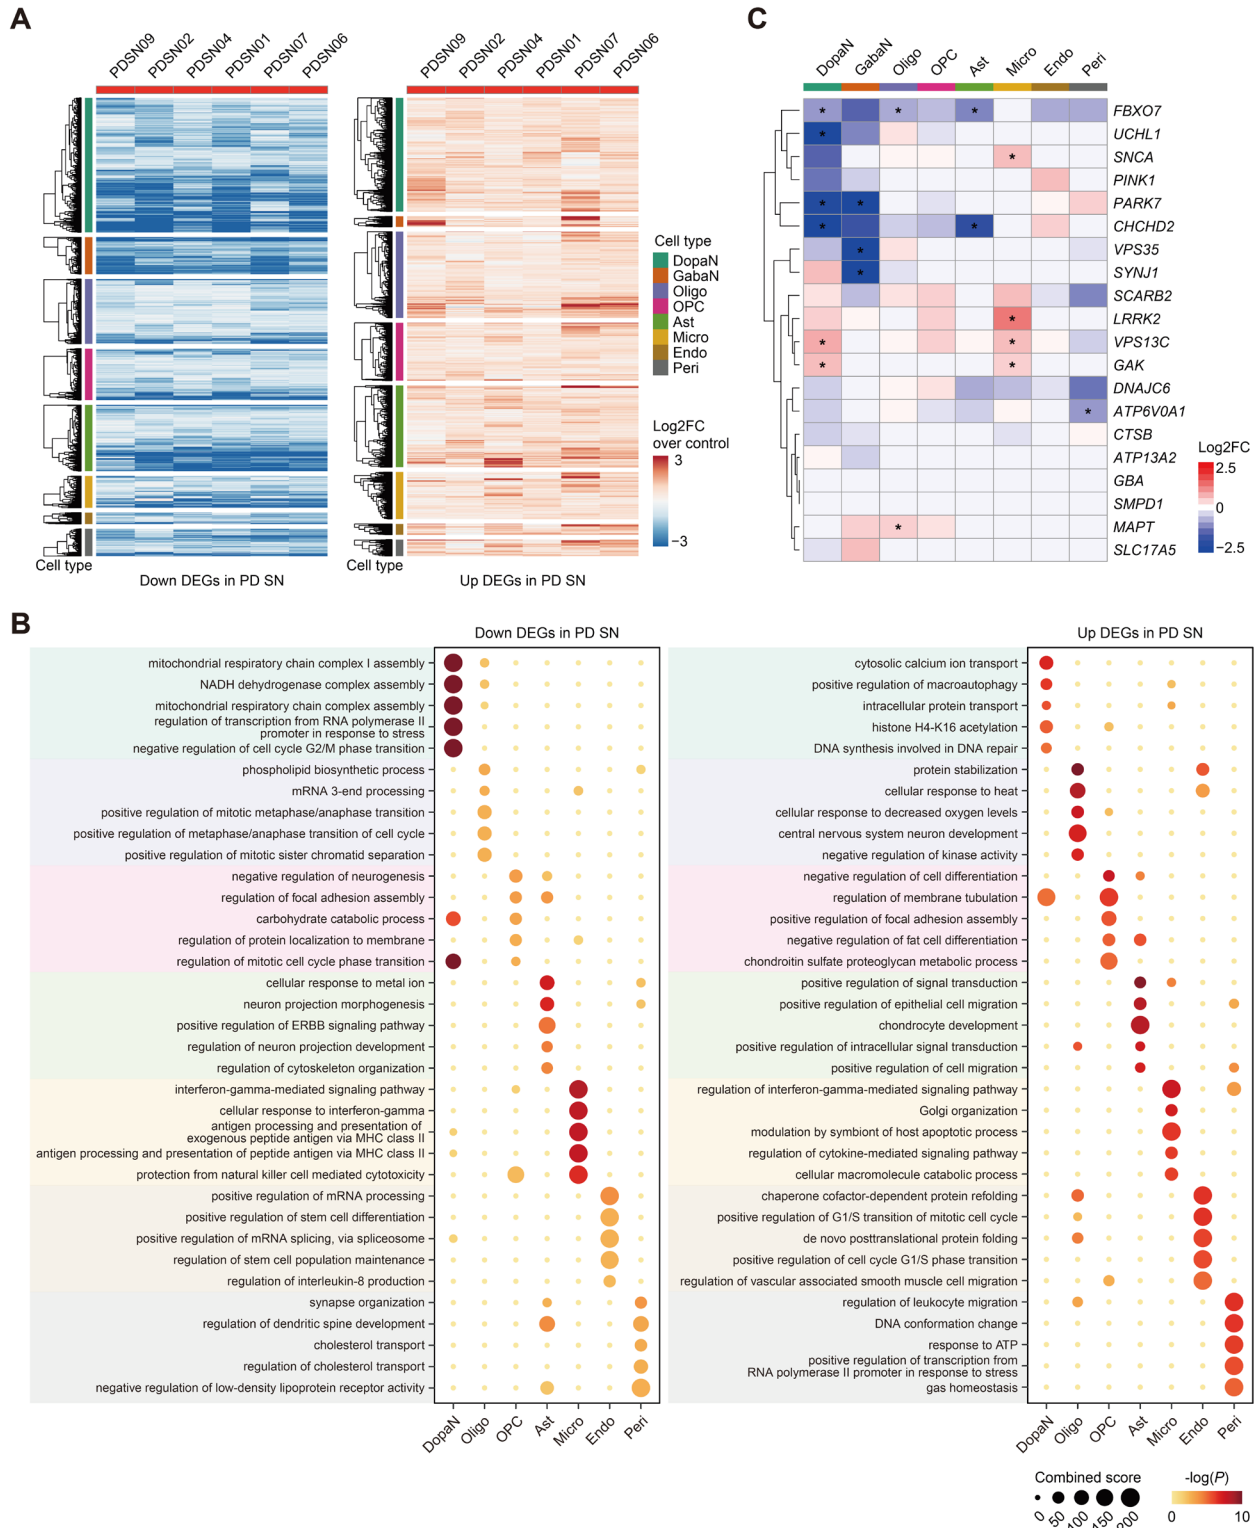

**Fig. S6. Assessment of PD-associated DEGs at the individual and cell type level.**

**(A)** A heatmap showing the log<sub>2</sub> fold change of cell type-resolved RNA-seq reads for each PD case compared to the mean of control cases for down-regulated DEGs (left) and up-regulated DEGs (right). **(B)** Enriched GO pathway analysis for down- (left) and up- (right) regulated DEGs showing the top 5 enriched biological processes for each cell type based on the significance level. **(C)** A heatmap showing the log<sub>2</sub> fold change of cell type-resolved RNA-seq reads for PD SN compared to control SN across 20 known PD risk genes in a cell type-specific manner. The asterisk represents snRNA-seq DEGs identified based on the following criteria: EdgeR-LRT BH-adjusted  $P < 0.05$ , log<sub>2</sub> fold change  $> 0.5$ , and minimum expressed cells  $> 0.1$ .

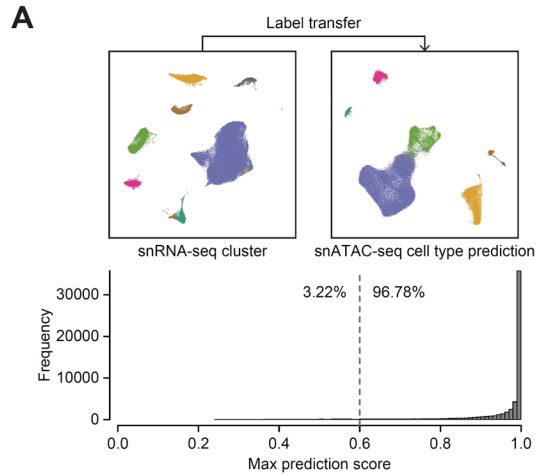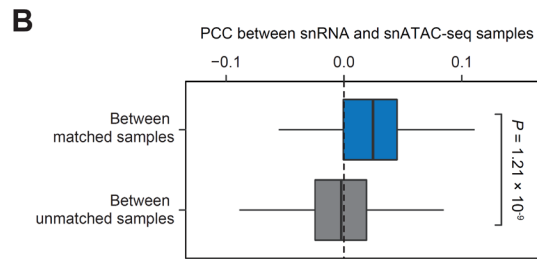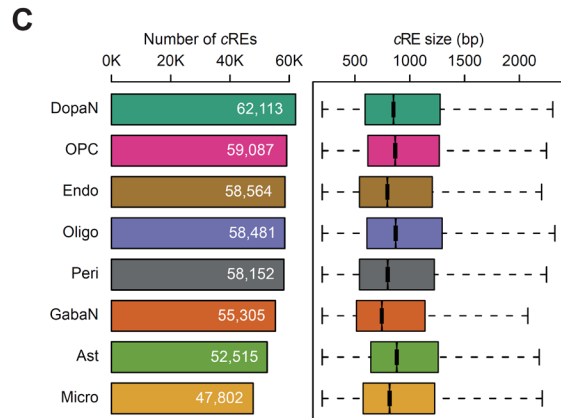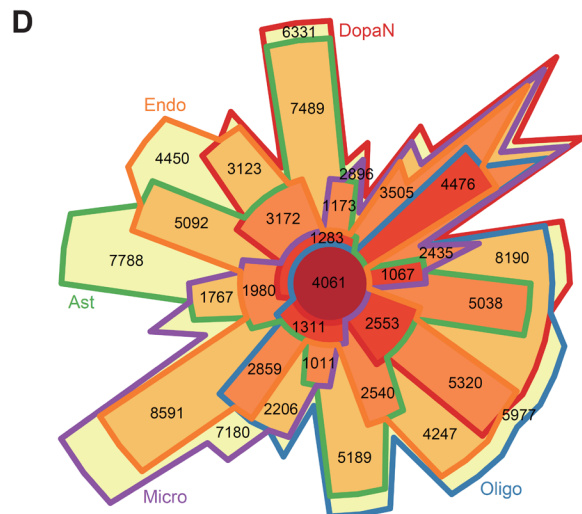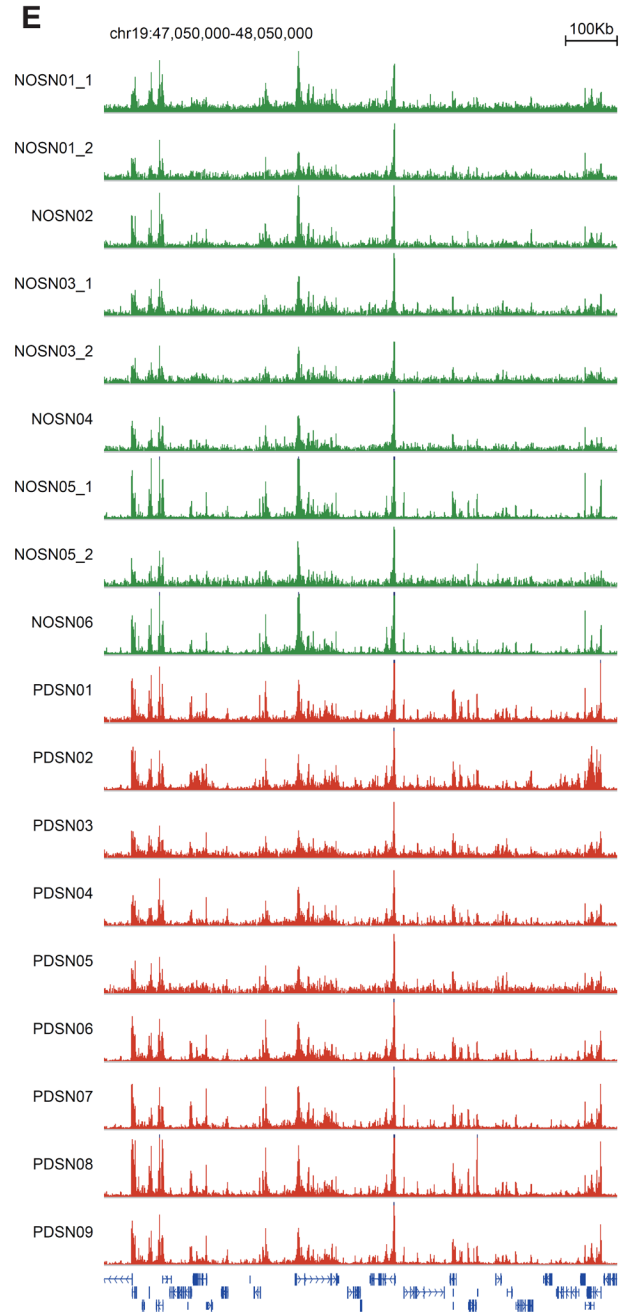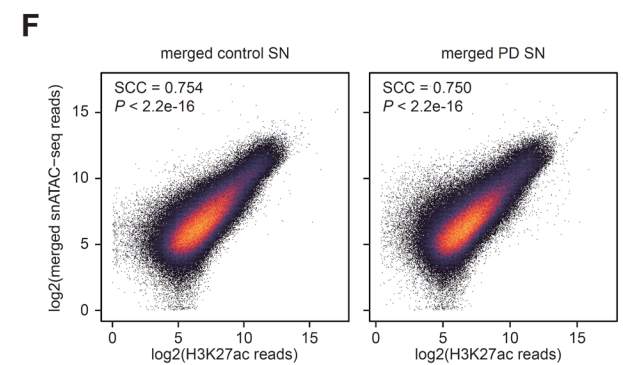

**Fig. S7. Characterization of cell type-resolved *cis*-regulatory landscape in the human SN.**

**(A)** Cell type label transfer and snATAC-seq cell type prediction using the label transfer algorithms. UMAP embeddings of cell type annotated snRNA-seq clusters and the predicted cell type in snATAC-seq clusters (up), and a histogram showing the distribution of max prediction score across snATAC-seq nuclei (down). **(B)** Boxplots showing the Pearson correlation coefficients between snRNA-seq and snATAC-seq data at the individual and cell type level comparing between matched and unmatched samples. The significance in difference between matched correlations and unmatched correlations was calculated based on two-sided Wilcoxon rank sum test. **(C)** Bar plots showing the number of cell type-resolved cREs (left), and boxplots illustrating the overall size of cell type-resolve cREs (right) for each cell type. Box represents the upper and lower interquartile range (IQR), and whiskers correspond to the highest and lowest points of  $1.5 \times$  the IQR. **(D)** A Chow-Ruskey plot illustrating the association of cell type-resolved cREs among dopaminergic neurons (DopaN), oligodendrocytes (Oligo), astrocytes (Ast), microglia (Micro), and endothelial cells (Endo). **(E)** Epigenome browser tracks for H3K27ac ChIP-seq signals in a genomic locus (chr19:47,050,000-48,050,000) showing the peak quality for individual samples. The ChIP-seq signals were normalized by the total reads mapped in cREs. **(F)** Scatter plots showing the correlation of log<sub>2</sub> merged ChIP-seq reads for PD (right) and control (left) SN against log<sub>2</sub> merged snATAC-seq reads across the cREs determined based on Spearman's correlation coefficient (SCC).

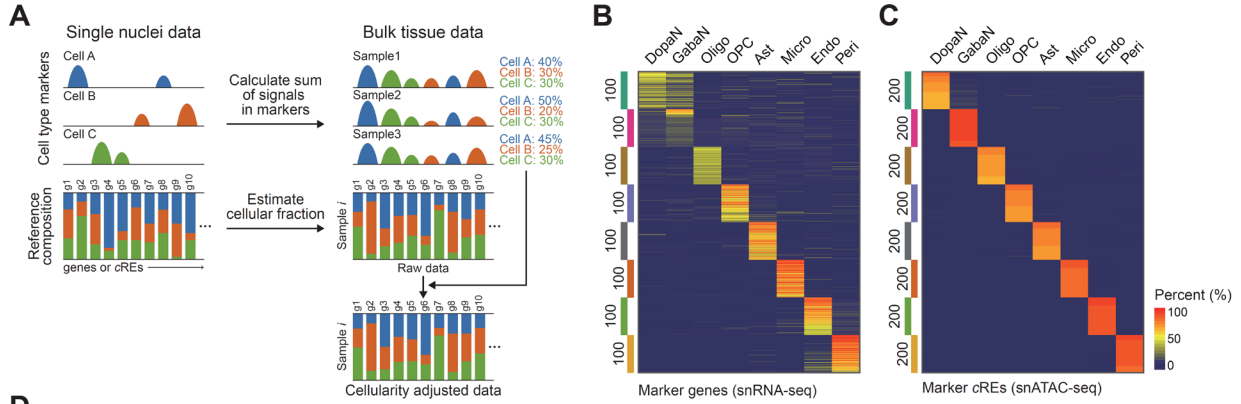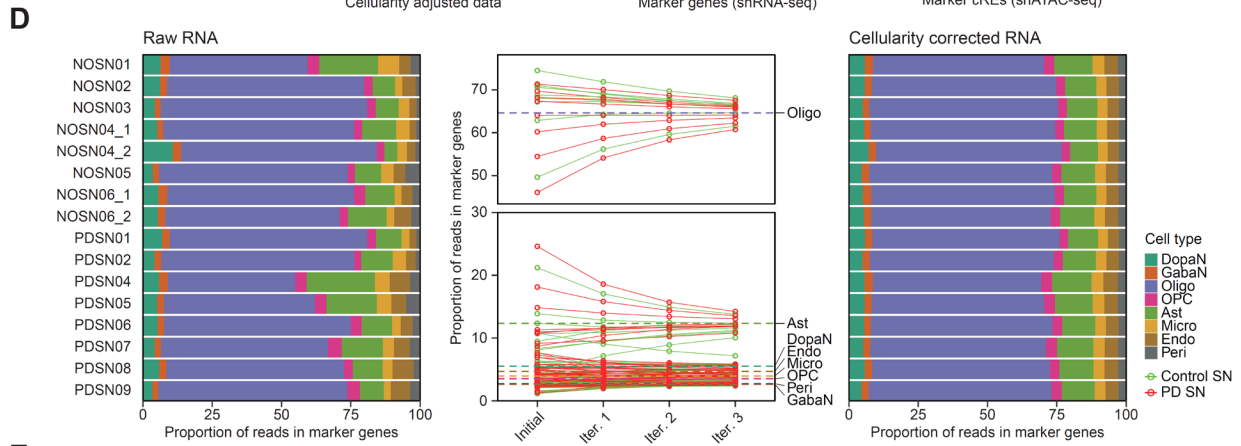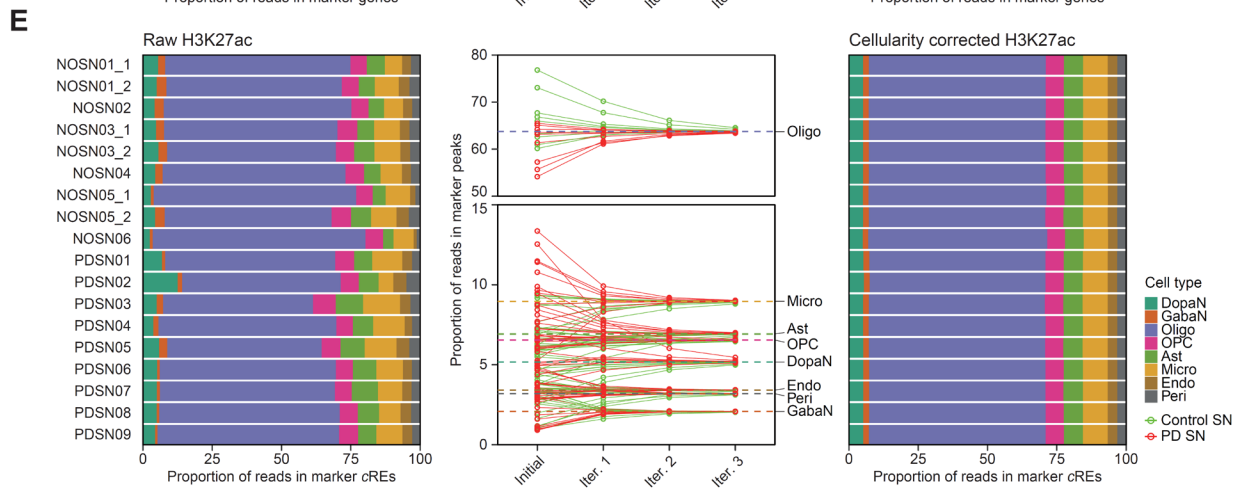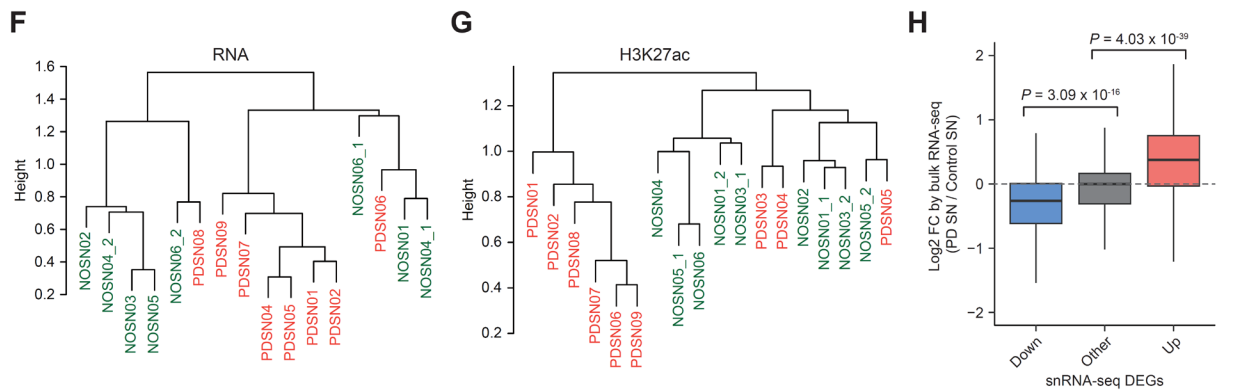



**Fig. S8. Cellularity evaluation and adjustment for bulk RNA-seq and ChIP-seq data.**

**(A)** Overview of an iterative cellularity correction approach. First, the sum of reads in unique marker genes or *cREs* is accounted for individual bulk assay samples in each cell type. Then, cellular heterogeneity for each sample is adjusted toward the average cellular compositions based on the cell type-resolved transcriptome and chromatin accessibility reference across the genes or *cREs*. **(B-C)** Heatmaps showing the percentage of reads across cell types over marker genes (B) and marker *cREs* (C). **(D)** Relative ratio of reads in marker genes before (left) and after (right) iterative cellularity correction for bulk RNA-seq samples. **(E)** Relative ratio of reads in marker *cREs* before (left) and after (right) iterative cellularity correction for bulk H3K27ac ChIP-seq samples. **(F-G)** Unbiased hierarchical clustering of bulk transcriptome (F) and H3K27ac activity (G) using the cellularity-corrected data across the PD and control samples. PD and control cases are highlighted by red and green, respectively. **(H)** Box plots illustrating the log<sub>2</sub> fold change of cellularity-corrected bulk RNA-seq expression (mean PD SN over mean control SN) based on PD-associated DEGs identified from snRNA-seq data.

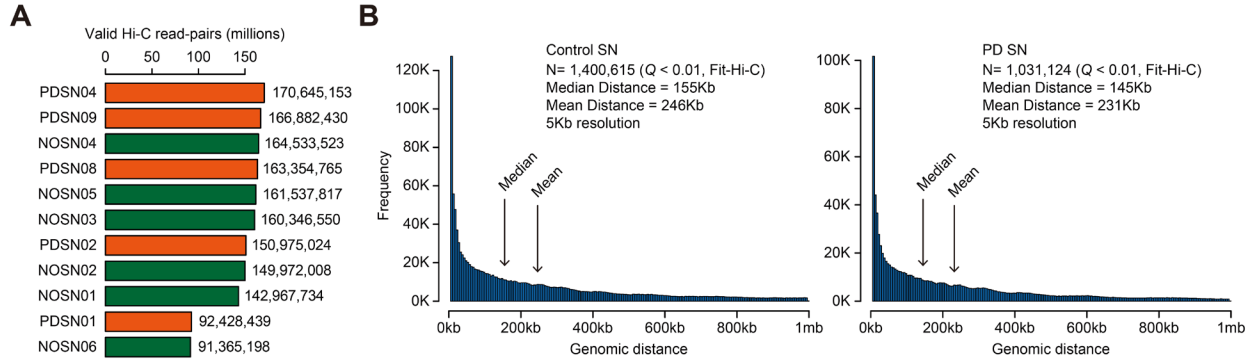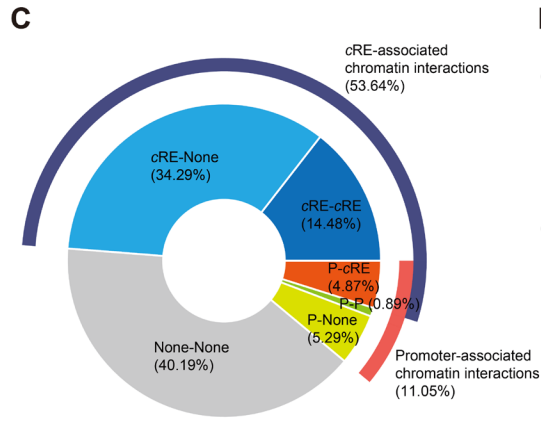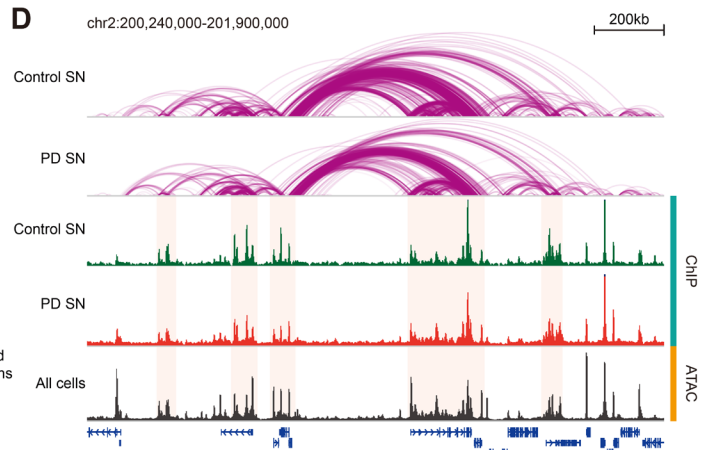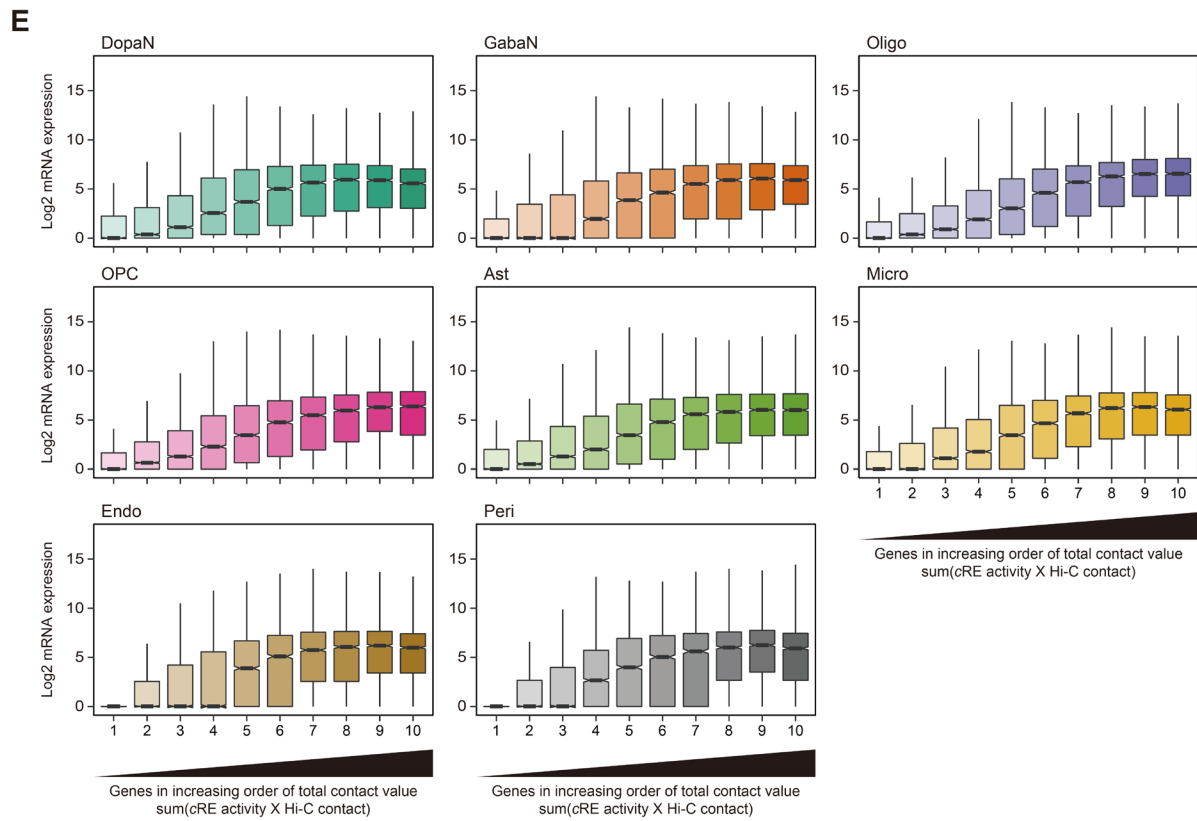

**Fig. S9. Characterization of high-resolution 3D chromatin interactions in human SN.**

**(A)** Distribution of valid and unique Hi-C read-pairs generated by each biological sample. **(B)** Histograms showing the distribution of genomic distances of significant chromatin interactions identified by control (left) and PD (right) SN. **(C)** A donut plot illustrating the ratio of long-range chromatin interactions among promoters, *cREs*, and non-regulatory regions. **(D)** Representative chromatin interaction profiles at a genome coordinate (chr2:200,240,000-201,900,000) with genome browser tracks of H3K27ac ChIP-seq reads for control (green) and PD (red) SN, along with merged pseudobulk snATAC-seq reads. The signals for ChIP-seq and pseudobulk snATAC-seq were normalized by the total reads mapped in *cREs*. Regions with enriched H3K27ac signals (translucent orange) show extensive chromatin interactions. **(E)** Notched box plots illustrating the correlation between gene expression and overall chromatin contacts connected to gene promoter in all cell types. In notched box plots, the center line is the median, notch displays the 95% CI of median, box represents the upper and lower IQR, and whiskers correspond to the highest and lowest points of 1.5× the IQR.

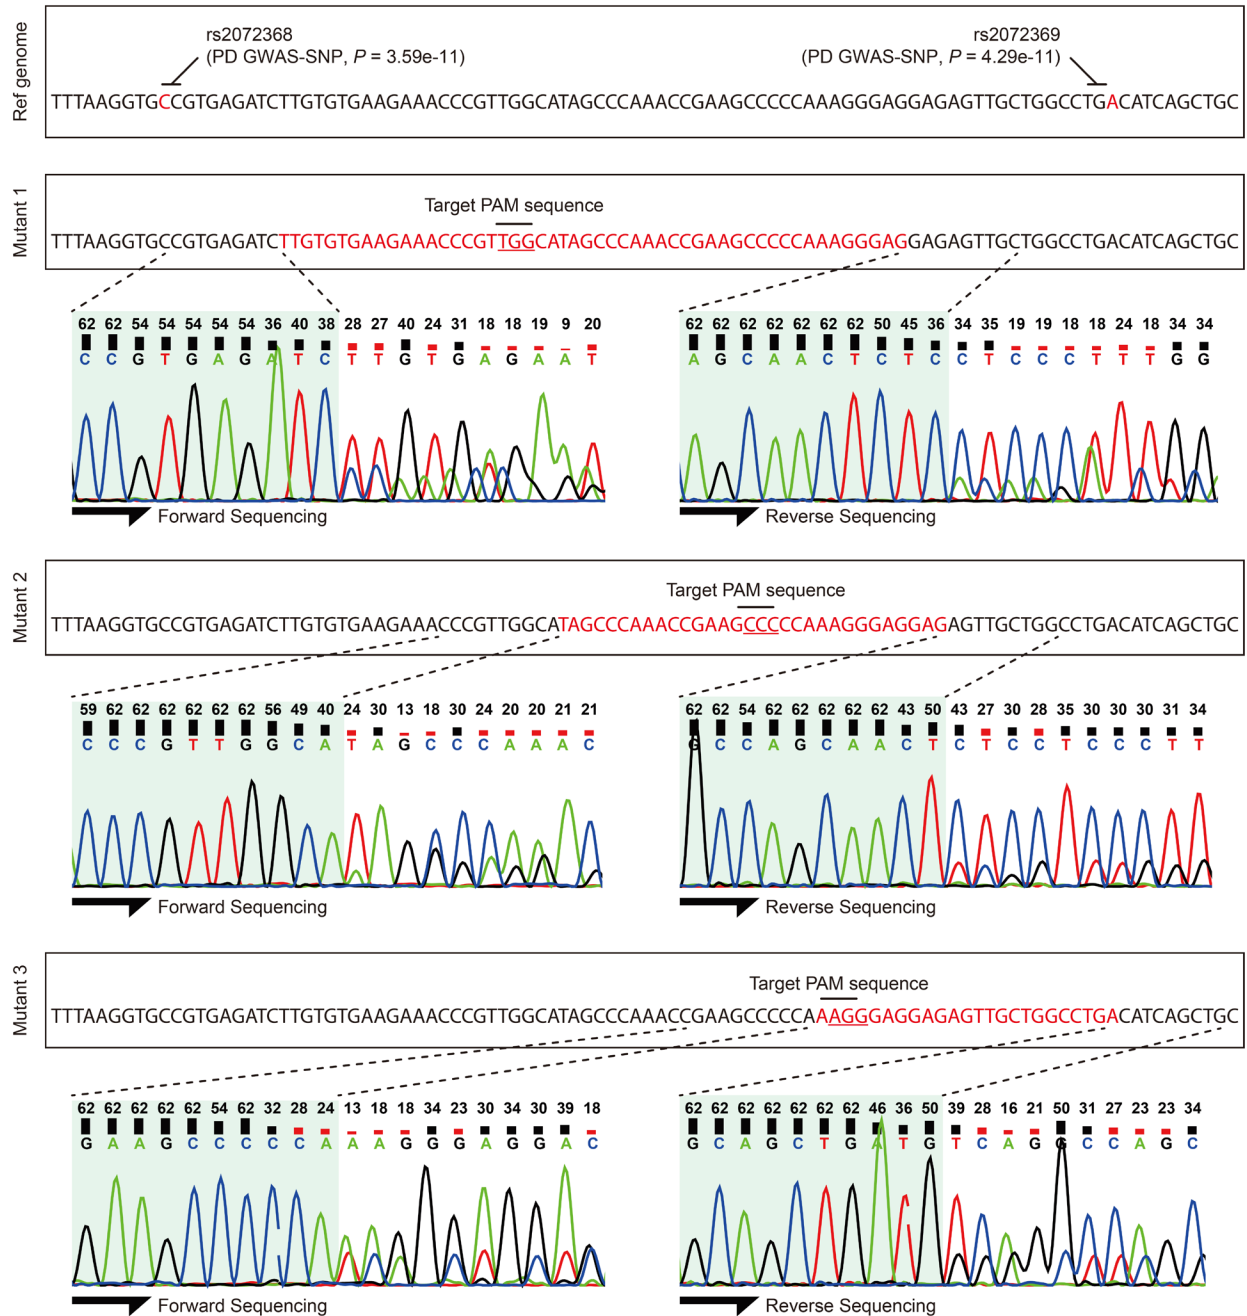

**Fig. S10. Evaluation of genetic sequence perturbation mediated by CRISPR-Cas9 genome editing in SH-SY5Y neuroblastoma.**

Illustration of the guide-RNA target site for CRISPR-Cas9 experiment in the parental SH-SY5Y genome and three mutant strains. Two PD GWAS-SNPs (rs2072368,  $P = 3.59 \times 10^{-11}$ ; rs2072369,  $P = 4.29 \times 10^{-11}$ ) are located within a target cRE (chr7:23144778-23146888). Three

mutant clones from three individual guide-RNAs having a different target PAM sequence contained mutations with a varying size ranging from 20-50 base-pairs, confirmed by paired-end Sanger sequencing.

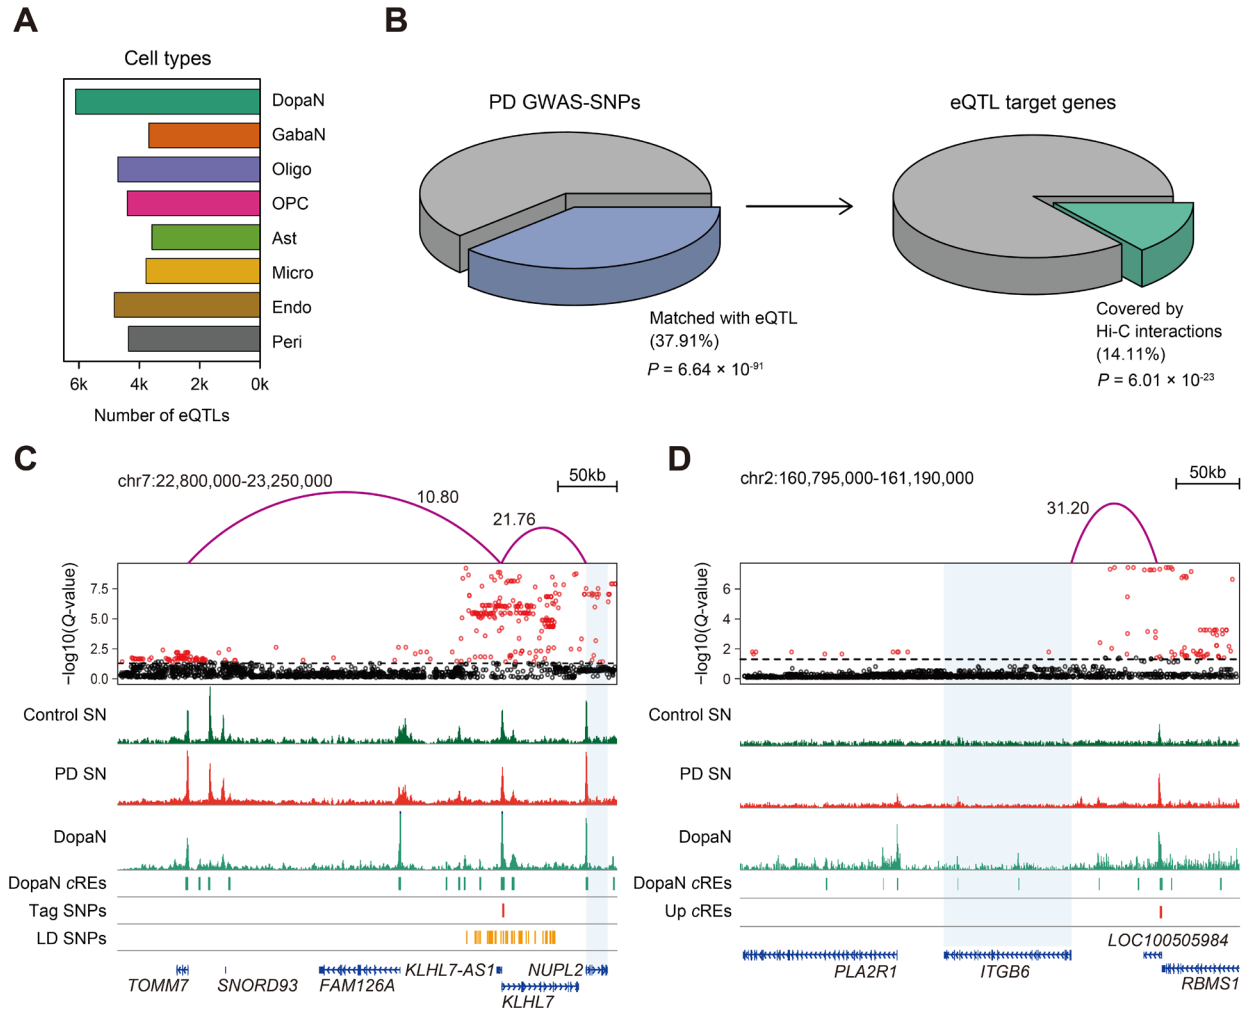

**Fig. S11. Integrative analysis of eQTL data set with cell type-resolved *cis*-regulatory landscape of the human SN.**

(A) Bar plots showing the overlap of significant eQTLs with cell type-resolved cRE in the human SN. (B) 3D pie charts illustrating the portion of LD-expanded PD GWAS-SNPs that matched with eQTLs (left), and the portion of eQTL-target gene association overlapped with Hi-C interactions by the matched GWAS-SNPs (right). The  $P$ -value and odd ratio were calculated using two-sided Fisher exact test for eQTL enrichment, and the significance of target gene overlap between eQTL associations and Hi-C interactions were calculated based on hypergeometric test (\*\*\*:  $P < 0.001$ ). (C-D) Example of a PD GWAS-SNP (C) and an up-

regulated *cRE* (D) in dopaminergic neurons whose significant chromatin interactions to a target gene promoter are supported by eQTL associations, with H3K27ac ChIP-seq tracks for PD and control SN and pseudobulk chromatin accessibility for dopaminergic neurons (DopaN). The signals for ChIP-seq and cell type-resolved snATAC-seq are normalized by the total reads mapped in *cRE*s. Significant long-range chromatin interactions shown in purple arcs with the corresponding ABC score.





**(A)** A Chow-Ruskey plot for putative target genes of dysregulated *c*REs and PD GWAS-SNPs for dopaminergic neurons (DopaN), oligodendrocytes (Oligo), astrocytes (Ast), microglia (Micro), and endothelial cells (Endo). **(B-C)** Left: scatterplots illustrating the putative target genes for dopaminergic neurons (B), and microglia (C) with an ABC score (x-axis) threshold of 10, with the annotation of top 10 genes with the highest ABC score, along with target genes of GWAS-SNPs. Putative target genes were grouped into three categories, whether they are anchored by down- (green circles), up-regulated (orange circles) *c*REs, or GWAS-SNP harboring *c*REs (navy saltire). Right: putative target genes were categorized based on DEG status and the representative GO biological pathways. **(D)** Bar plots showing 75 enriched mammalian phenotypes ( $P < 0.05$  and the number of associated genes  $\geq 8$ ) linked to putative targets of dysregulated *c*REs and PD GWAS-SNPs. 28 phenotype ontologies related to neurological, movement, and immune symptoms potentially associated with PD are highlighted in blue. The full list of enriched phenotype ontologies and their associated genes are provided in table S6.

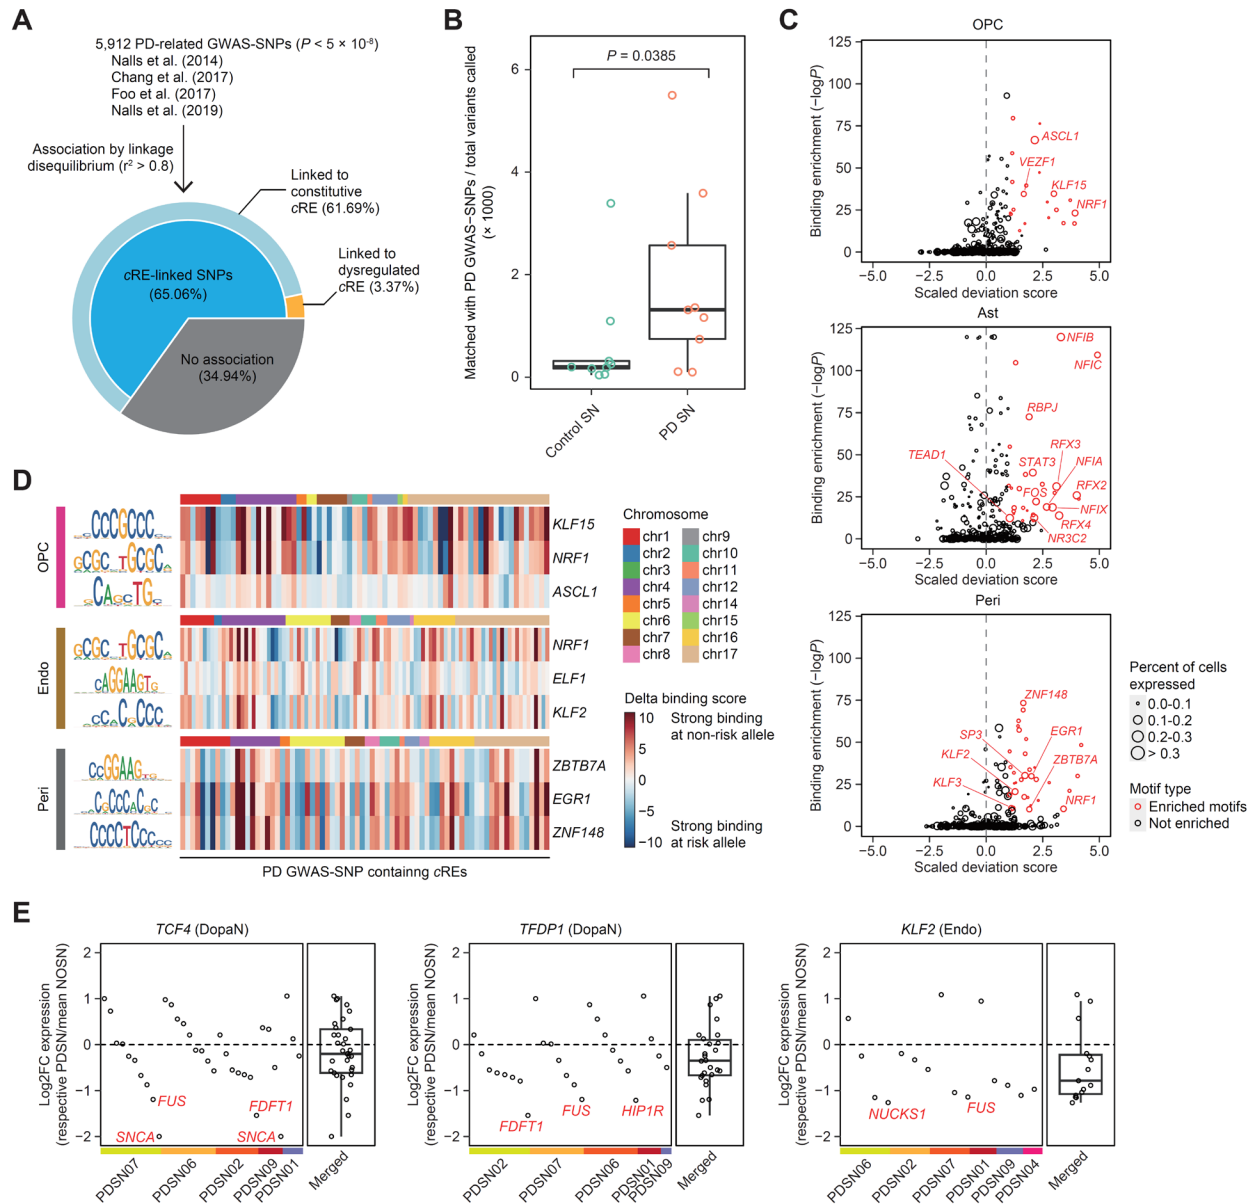

**Fig. S13. Characterization of PD GWAS-SNPs based on *cis*-regulatory landscape of the human SN.**

(A) A stacked donut chart showing the proportion of 5,912 PD GWAS-SNPs associated with *cRE*s identified in the human SN based on LD structure ( $r^2 > 0.8$ ). (B) Box plot illustrating the level of individual SNPs matched in PD GWAS-SNPs between PD and control groups. The difference in the number of GWAS-matched SNPs between PD and control groups was calculated through one-sided Wilcoxon rank sum test. (C) Scatter plots illustrating the  $-\log_{10}$

hypergeometric enrichment of TFs and the scaled chromVAR deviation score, depicting TF motif activity, for OPC, astrocyte, and pericyte. The size of each data point represents the percent of nuclei expressed, and TFs with minimum expression detected greater than 10% were selected as enriched TFs. **(D)** Heat maps showing the delta binding scores of individual PD GWAS-SNP-containing *c*REs across the genome, for enriched TFs in OPC, endothelial cell, and pericyte. **(E)** Scatter plots describing the log<sub>2</sub> fold change expression (a respective PD donor over the mean of control samples) for target genes of *c*REs with disruption in binding motifs for respective TFs by GWAS-matched donor variants based on cumulative ABC score greater than 1. The name of target genes with log<sub>2</sub> fold change less than -1 is labeled in red.

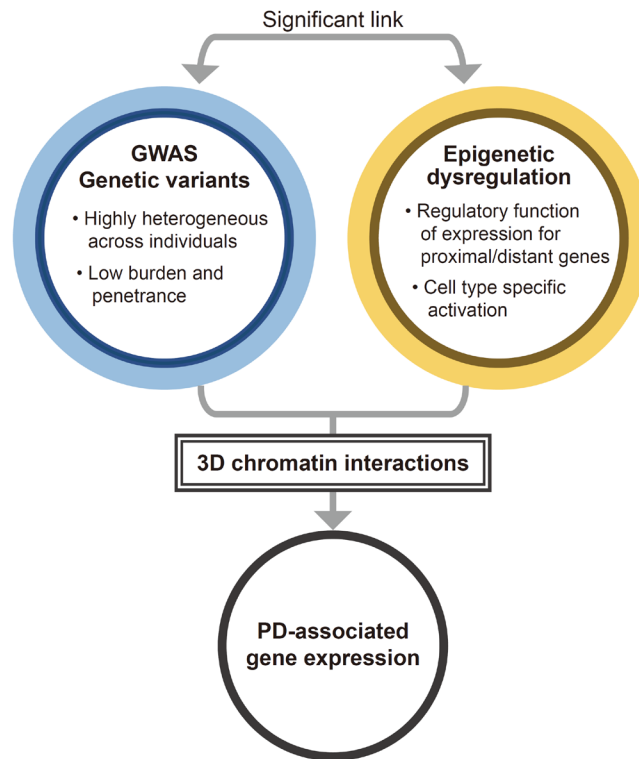

**Fig. S14. Contribution of genetic and epigenetic perturbations in sporadic PD pathogenesis.**

A schematic overview illustrating the effects of GWAS-variants and *cis*-regulatory dysregulation in PD-specific gene expression.

### **Supplementary Tables:**

Table S1. Sample information.

Table S2. List of nuclei obtained from single-nucleus data and sample demultiplexing.

Table S3. List of PD-associated differentially expressed genes identified by snRNA-seq.

Table S4. List of dysregulated *c*REs in PD SN.

Table S5. List of putative target genes for individual cell types.

Table S6. List of enriched MGI mouse phenotypes in putative target genes.

Table S7. Source information for GWAS summary statistics.

Table S8. List of enriched transcription factors and motifs.

Table S9. List of altered TF binding scores for GWAS-SNP-containing *c*REs.

Table S10. Enriched pathways of putative target gene clusters.
